# Supplementary material
Source: publisher figshare collection journal article supplement (https://acs.figshare.com/ndownloader/files/4708129)
Supplement: Supplementary file 1 [file 4708129]

### Supporting Figure 3

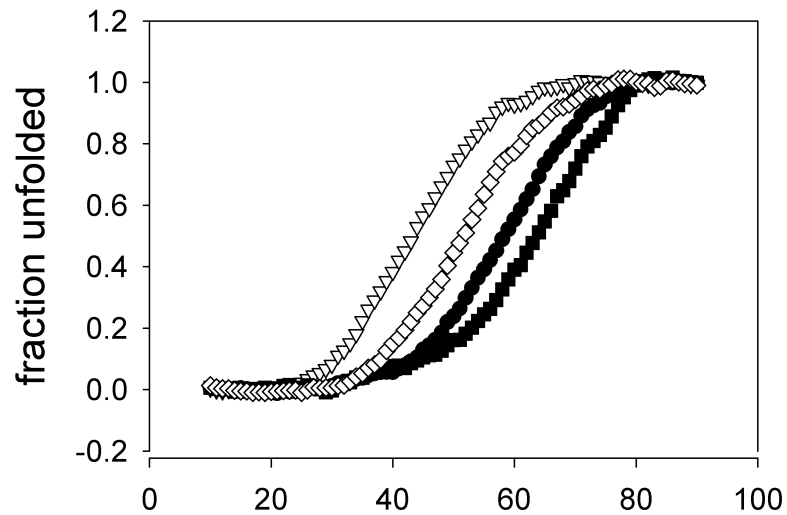

Supporting Figure 3. Analysis of unfolding by CD spectroscopy. The thermal transition was measured of unbound nGLP-1R (open triangles), GLP-1-bound nGLP-1R (open diamonds), GLP-1/Ex4-bound nGLP-1R (black circles) and Ex4-bound nGLP-1R (black squares). The concentration of nGLP-1R was 7  $\mu$ M and the concentration of ligands was 21  $\mu$ M. The data were collected at a scan rate of 60  $^{\circ}$ C/h from 10 to 90  $^{\circ}$ C.
